# Supplementary material
Source: PubMed Central journal article supplement (PMC3203698)
Supplement: cr201127x1.pdf [file cr201127x1.pdf]

Supplementary information, Figure S1

**A**

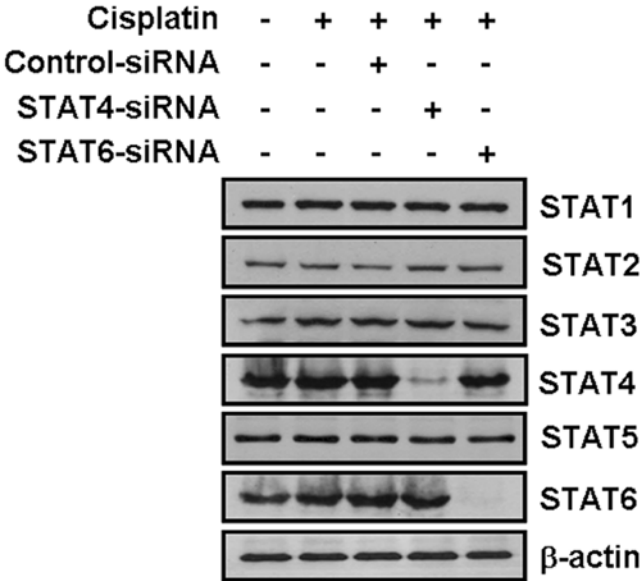

**B**

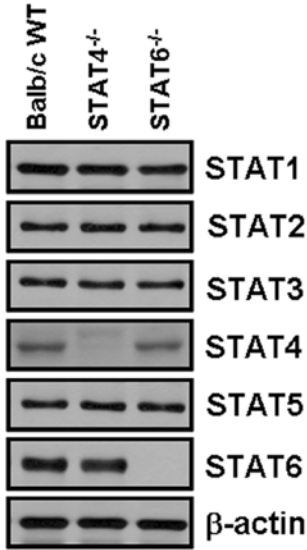

**Figure S1 (A)** Expression of STAT proteins by transfection of STAT4- or STAT6-siRNA into HEI-OC1 auditory cells. **(B)** Expressions of STAT proteins in wild type (WT), STAT4<sup>-/-</sup> and STAT6<sup>-/-</sup> mice.
